# Supplementary material for: Transcriptome Profile Analysis of Sugarcane Responses toSporisorium scitamineaInfection Using Solexa Sequencing Technology
Source: Hindawi journal article supplement (doi:10.1155/2013/298920), 2013-01-01

# Distribution of Clean Tag Copy Number

## Distribution of Ya05-179-CK Total Clean Tags

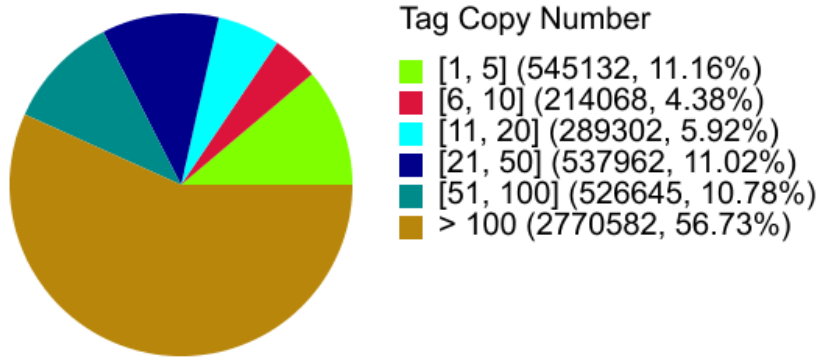

## Distribution of Ya05-179-CK Distinct Clean Tags

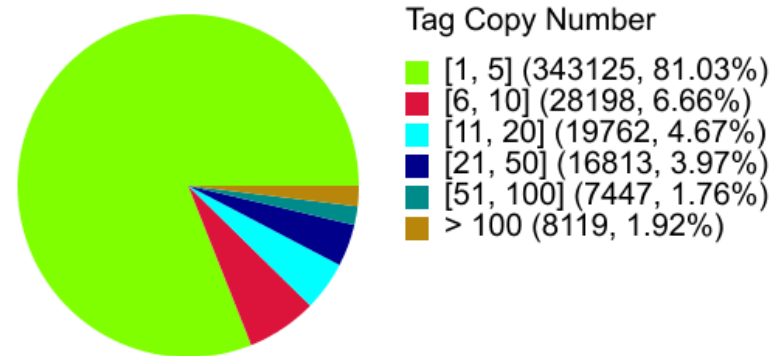

## Distribution of Ya05-179-inoculation Total Clean Tags

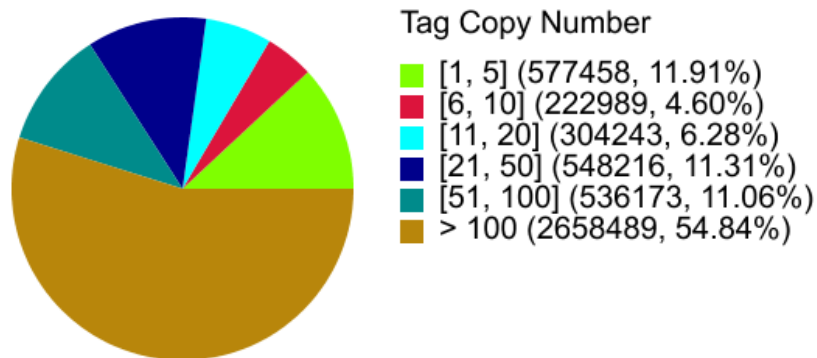

## Distribution of Ya05-179-inoculation Distinct Clean Tags

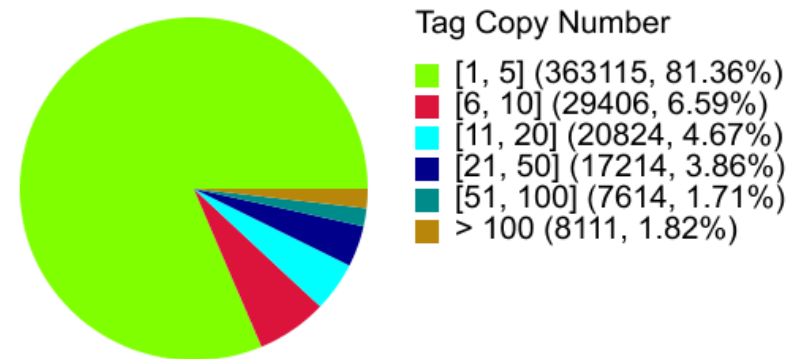

Supplement: f2 [file 298920.f2.pdf]
