# Supplementary material for: Transcriptome Profile Analysis of Sugarcane Responses to Sporisorium scitaminea Infection Using Solexa Sequencing Technology
Source: Biomed Res Int. 2013 Oct 23;2013:298920. doi: 10.1155/2013/298920 (PMC3830884; doi:10.1155/2013/298920)
Supplement: Supplementary file 4 [file 298920.f4.xls]

## Sheet: Sheet1
Additional File 4 - Gene ontology analysis for differentially expressed genes in sugarcane.
Cellular componet			Biological process			Molecular function
Gene Ontology term	Number of gene, percent		Gene Ontology term	Number of gene, percent		Gene Ontology term	Number of gene, percent
nucleus	77 out of 171 genes, 45.0%		ncRNA metabolic process	14 out of 157 genes, 8.9%		double-stranded DNA binding	3 out of 163 genes, 1.8%
membrane-bounded organelle	2 out of 171 genes, 1.2%		cellular process	149 out of 157 genes,94.8%		damaged DNA binding	2 out of 163 genes, 1.2%
membrane-bounded organelle	100 out of 171 genes, 58.5%		nitrogen compound metabolic process	53 out of 157 genes, 33.8%		structure-specific DNA binding	4 out of 163 genes, 2.5%
intracellular membrane-bounded organelle	100 out of 171 genes, 58.5%		nucleobase, nucleoside, nucleotide and nucleic acid metabolic process	46 out of 157 genes, 29.3%		DNA-dependent ATPase activity	3 out of 163 genes, 1.8%
integral to membrane	8 out of 171 genes, 4.7%		positive regulation of meiosis	2 out of 157 genes, 1.3%		single-stranded DNA binding	3 out of 163 genes, 1.8%
intrinsic to membrane	8 out of 171 genes, 4.7%		replication fork protection	2 out of 157 genes, 1.3%		snoRNA binding	2 out of 163 genes, 1.2%
replication fork	2 out of 171 genes, 1.2%		DNA duplex unwinding	2 out of 157 genes, 1.3%		ATP-dependent DNA helicase activity	2 out of 163 genes
cytosol	55 out of 171 genes, 32.2%		protein ubiquitination during ubiquitin-dependent protein catabolic process	2 out of 157 genes, 1.3%		ATPase activity	13 out of 163 genes, 8.0%
organelle	127 out of 171 genes, 74.3%		maintenance of cell polarity	2 out of 157 genes, 1.3%		cytoskeletal protein binding	2 out of 163 genes, 1.2%
intracellular organelle	127 out of 171 genes, 74.3%		DNA geometric change	2 out of 157 genes, 1.3%		ATPase activity, coupled	10 out of 163 genes, 6.1%
plasma membrane	4 out of 171 genes, 2.3%		maintenance of fidelity during DNA-dependent DNA replication	2 out of 157 genes, 1.3%		DNA helicase activity	2 out of 163 genes, 1.2%
membrane	27 out of 171 genes, 15.8%		DNA-dependent DNA replication	5 out of 157 genes, 3.2%		DNA binding	17 out of 163 genes, 10.4%
small nucleolar ribonucleoprotein complex	2 out of 171 genes, 1.2%		regulation of meiosis	2 out of 157 genes, 1.3%		phosphatase activity	5 out of 163 genes, 3.1%
cytoplasmic part	100 out of 171 genes, 58.5%		ncRNA processing	10 out of 157 genes, 6.4%		nucleotidyltransferase activity	4 out of 163 genes, 2.5%
spindle pole body	3 out of 171 genes, 1.8%		RNA processing	15 out of 157 genes, 9.6%		RNA binding	12 out of 163 genes, 7.4%
DNA-directed RNA polymerase II, holoenzyme	2 out of 171 genes, 1.2%		actin cortical patch localization	2 out of 157 genes, 1.3%		helicase activity	6 out of 163 genes, 3.7%
spindle pole	3 out of 171 genes, 1.8%		RNA metabolic process	31 out of 157 genes, 19.7%		phosphoric ester hydrolase activity	5 out of 163 genes, 3.1%
microtubule organizing center	3 out of 171 genes, 1.8%		regulation of meiosis	2 out of 157 genes, 1.3%		general RNA polymerase II transcription factor activity	2 out of 163 genes, 1.2%
cytoplasm	119 out of 171 genes, 69.6%		regulation of kinase activity	3 out of 157 genes, 1.9%		methyltransferase activity	4 out of 163 genes, 2.5%
cellular bud	2 out of 171 genes, 1.2%		regulation of protein kinase activity	3 out of 157 genes, 1.9%		ATPase activity, coupled to transmembrane movement of substances	5 out of 163 genes, 3.1%
membrane part	14 out of 171 genes, 8.2%		regulation of transferase activity	3 out of 157 genes, 1.9%		transferase activity, transferring one-carbon groups	4 out of 163 genes, 2.5%
nucleolus	7 out of 171 genes, 4.1%		regulation of phosphorylation	3 out of 157 genes, 1.9%		ATPase activity, coupled to movement of substances	5 out of 163 genes, 3.1%
small-subunit processome	2 out of 171 genes, 1.2%		regulation of phosphorylation	3 out of 157 genes, 1.9%		sequence-specific DNA binding	3 out of 163 genes, 1.8%
nuclear part	21 out of 171 genes, 12.3%		regulation of phosphate metabolic process	3 out of 157 genes, 1.9%		protein tag	3 out of 163 genes, 1.8%
endosome	2 out of 171 genes, 1.2%		regulation of phosphorus metabolic process	3 out of 157 genes, 1.9%		nucleic acid binding	33 out of 163 genes, 20.2%
large ribosomal subunit	5 out of 171 genes, 2.9%		response to metal ion	2 out of 157 genes, 1.3%		RNA polymerase II transcription factor activity	2 out of 163 genes, 1.2%
nuclear lumen	10 out of 171 genes, 5.8%		pyrimidine deoxyribonucleotide metabolic process	2 out of 157 genes, 1.3%		protein homodimerization activity	2 out of 163 genes, 1.2%
cytosolic large ribosomal subunit	4 out of 171 genes, 2.3%		2'-deoxyribonucleotide metabolic process	2 out of 157 genes, 1.3%		cation-transporting ATPase activity	4 out of 163 genes, 2.5%
spindle	3 out of 171 genes, 1.8%		deoxyribose phosphate metabolic process	2 out of 157 genes, 1.3%		zinc ion binding	3 out of 163 genes, 1.8%
endomembrane system	6 out of 171 genes, 3.5%		D-ribose metabolic process	2 out of 157 genes, 1.3%		primary active transmembrane transporter activity	5 out of 163 genes, 3.1%
protein-DNA complex	11 out of 171 genes, 6.4%		protein amino acid acetylation	3 out of 157 genes, 1.9%		P-P-bond-hydrolysis-driven transmembrane transporter activity	5 out of 163 genes, 3.1%
nuclear nucleosome	5 out of 171 genes, 2.9%		snoRNA metabolic process	2 out of 157 genes, 1.3%		DNA-directed RNA polymerase activity	2 out of 163 genes, 1.2%
ribonucleoprotein complex	35 out of 171 genes, 20.5%		regulation of meiotic cell cycle	2 out of 157 genes, 1.3%		RNA polymerase activity	2 out of 163 genes, 1.2%
organelle lumen	12 out of 171 genes, 7.0%		meiosis I	3 out of 157 genes, 1.9%		identical protein binding	2 out of 163 genes, 1.2%
intracellular organelle lumen	12 out of 171 genes, 7.0%		protein amino acid acylation	3 out of 157 genes, 1.9%		hydrolase activity, acting on acid anhydrides, catalyzing transmembrane movement of substances	5 out of 163 genes, 3.1%
nucleosome	10 out of 171 genes, 5.8%		endonucleolytic cleavage to generate mature 5'-end of SSU-rRNA from (SSU-rRNA, 5.8S rRNA, LSU-rRNA)	2 out of 157 genes, 1.3%		ATPase activity, coupled to transmembrane movement of ions	4 out of 163 genes, 2.5%
proton-transporting two-sector ATPase complex	3 out of 171 genes, 1.8%		endonucleolytic cleavage in 5'-ETS of tricistronic rRNA transcript (SSU-rRNA, 5.8S rRNA, LSU-rRNA)	2 out of 157 genes, 1.3%		transferase activity, transferring phosphorus-containing groups	16 out of 163 genes, 9.8%
membrane-enclosed lumen	12 out of 171 genes, 7.0%		RNA 5'-end processing	2 out of 157 genes, 1.3%		hydrolase activity, acting on ester bonds	5 out of 163 genes, 3.1%
ribosome	24 out of 171 genes, 14.0%		rRNA 5'-end processing	2 out of 157 genes, 1.3%		hydrogen ion transmembrane transporter activity	4 out of 163 genes, 2.5%
cytosolic part	8 out of 171 genes, 4.7%		ncRNA 5'-end processing	2 out of 157 genes, 1.3%		proton-transporting ATPase activity, rotational mechanism	3 out of 163 genes, 1.8%
cytosolic ribosome	7 out of 171 genes, 4.1%		biopolymer metabolic process	93 out of 157 genes, 59.2%		monovalent inorganic cation transmembrane transporter activity	4 out of 163 genes, 2.5%
chromosomal part	13 out of 171 genes, 7.6%		rRNA processing	8 out of 157 genes, 5.1%		hydrolase activity, acting on glycosyl bonds	2 out of 163 genes, 1.2%
preribosome	3 out of 171 genes, 1.8%		macromolecule metabolic process	93 out of 157 genes, 59.2%		transition metal ion binding	6 out of 163 genes, 3.7%
chromosome	14 out of 171 genes, 8.2%		response to inorganic substance	2 out of 157 genes, 1.3%		protein binding	26 out of 163 genes, 16.0%
intracellular part	155 out of 171 genes, 90.6%		cellular macromolecule metabolic process	90 out of 157 genes, 57.3%		active transmembrane transporter activity	5 out of 163 genes, 3.1%
nuclear chromosome part	7 out of 171 genes, 4.1%		negative regulation of DNA replication	2 out of 157 genes, 1.3%		structural constituent of ribosome	13 out of 163 genes, 8.0%
ribosomal subunit	9 out of 171 genes, 5.3%		negative regulation of DNA metabolic process	2 out of 157 genes, 1.3%		inorganic cation transmembrane transporter activity	4 out of 163 genes, 2.5%
nuclear chromosome	7 out of 171 genes, 4.1%		mRNA transport	4 out of 157 genes, 2.5%		iron ion binding	3 out of 163 genes, 1.8%
90S preribosome	2 out of 171 genes, 1.2%		cellular metabolic process	111 out of 157 genes, 70.7%		cation transmembrane transporter activity	4 out of 163 genes, 2.5%
nuclear envelope	2 out of 171 genes, 1.2%		®ulation of transposition, RNA-mediated	2 out of 157 genes, 1.3%		ATP-dependent helicase activity	3 out of 163 genes, 1.8%
chromatin	11 out of 171 genes, 6.4%		transposition, RNA-mediated	2 out of 157 genes, 1.3%		purine NTP-dependent helicase activity	3 out of 163 genes, 1.8%
site of polarized growth	4 out of 171 genes, 2.3%		regulation of MAP kinase activity	2 out of 157 genes, 1.3%		nucleoside-triphosphatase activity	24 out of 163 genes, 14.7%
nuclear chromatin	6 out of 171 genes, 3.5%		rRNA metabolic process	8 out of 157 genes, 5.1%		aminoacyl-tRNA ligase activity	2 out of 163 genes, 1.2%
cytosolic small ribosomal subunit	3 out of 171 genes, 1.8%		endonucleolytic cleavages during rRNA processing	2 out of 157 genes, 1.3%		metal ion binding	16 out of 163 genes, 9.8%
nucleoplasm part	3 out of 171 genes, 1.8%		endonucleolytic cleavage of tricistronic rRNA transcript (SSU-rRNA, 5.8S rRNA, LSU-rRNA)	2 out of 157 genes, 1.3%		ligase activity	9 out of 163 genes, 5.5%
cell cortex part	2 out of 171 genes, 1.2%		regulation of translational fidelity	2 out of 157 genes, 1.3%		ligase activity, forming aminoacyl-tRNA and related compounds	2 out of 163 genes, 1.2%
mitochondrial matrix	2 out of 171 genes, 1.2%		RNA modification	3 out of 157 genes, 1.9%		kinase activity	12 out of 163 genes, 7.4%
nucleoplasm	3 out of 171 genes, 1.8%		deoxyribonucleotide metabolic process	2 out of 157 genes, 1.3%		ion binding	16 out of 163 genes, 9.8%
mitochondrial lumen	2 out of 171 genes, 1.2%		transposition	2 out of 157 genes, 1.3%		cation binding	16 out of 163 genes, 9.8%
cell cortex	2 out of 171 genes, 1.2%		cellular biopolymer metabolic process	89 out of 157 genes, 56.7%		ligase activity, forming carbon-oxygen bonds	2 out of 163 genes, 1.2%
actin cytoskeleton	2 out of 171 genes, 1.2%		cleavages during rRNA processing	4 out of 157 genes, 2.5%		protein serine/threonine kinase activity	5 out of 163 genes, 3.1%
non-membrane-bounded organelle	51 out of 171 genes, 29.8%		MAPKKK cascade involved in osmosensory signaling pathway			hydrolase activity	40 out of 163 genes, 24.5%
intracellular non-membrane-bounded organelle	51 out of 171 genes, 29.8%		nucleotide-excision repair	2 out of 157 genes, 1.3%		ion transmembrane transporter activity	4 out of 163 genes, 2.5%
cell	171 out of 171 genes, 100.0%		pseudouridine synthesis	2 out of 157 genes, 1.3%		phosphotransferase activity, alcohol group as acceptor	8 out of 163 genes, 4.9%
cell part	171 out of 171 genes, 100.0%		DNA replication	5 out of 157 genes, 3.2%		pyrophosphatase activity	24 out of 163 genes, 14.7%
small ribosomal subunit	4 out of 171 genes, 2.3%		biopolymer biosynthetic process	58 out of 157 genes, 36.9%		transcription regulator activity	2 out of 163 genes, 1.2%
Golgi apparatus	4 out of 171 genes, 2.3%		vacuolar acidification	4 out of 157 genes, 2.5%		hydrolase activity, acting on acid anhydrides, in phosphorus-containing anhydrides	24 out of 163 genes, 14.7%
proteasome complex	2 out of 171 genes, 1.2%		pH reduction	4 out of 157 genes, 2.5%		rRNA binding	2 out of 163 genes, 1.2%
macromolecular complex	65 out of 171 genes, 38.0%		intracellular pH reduction	4 out of 157 genes, 2.5%		hydrolase activity, acting on acid anhydrides	24 out of 163 genes, 14.7%
mitochondrion	14 out of 171 genes, 8.2%		regulation of cellular pH	4 out of 157 genes, 2.5%		oxidoreductase activity	14 out of 163 genes, 8.6%
intracellular organelle part	48 out of 171 genes, 28.1%		regulation of intracellular pH	4 out of 157 genes, 2.5%		transmembrane transporter activity	6 out of 163 genes, 3.7%
organelle part	48 out of 171 genes, 28.1%		cellular chemical homeostasis	5 out of 157 genes, 3.2%		phosphoprotein phosphatase activity	2 out of 163 genes, 1.2%
endoplasmic reticulum	3 out of 171 genes, 1.8%		cellular monovalent inorganic cation homeostasis	4 out of 157 genes, 2.5%		protein kinase activity	7 out of 163 genes, 4.3%
intracellular	156 out of 171 genes, 91.2%		RNA splicing	5 out of 157 genes, 3.2%		protein dimerization activity	2 out of 163 genes, 1.2%
organelle envelope	3 out of 171 genes, 1.8%		regulation of pH	4 out of 157 genes, 2.5%		ligase activity, forming carbon-nitrogen bonds	5 out of 163 genes, 3.1%
envelope	3 out of 171 genes, 1.8%		monovalent inorganic cation homeostasis	4 out of 157 genes, 2.5%		substrate-specific transmembrane transporter activity	4 out of 163 genes, 2.5%
mitochondrial part	3 out of 171 genes, 1.8%		chemical homeostasis	5 out of 157 genes, 3.2%		peptidase activity, acting on L-amino acid peptides	3 out of 163 genes, 1.8%
protein complex	22 out of 171 genes, 12.9%		gene expression	60 out of 157 genes, 38.2%		transferase activity	25 out of 163 genes, 15.3%
cytoskeleton	8 out of 171 genes, 4.7%		ribonucleoprotein complex biogenesis	13 out of 157 genes, 8.3%		catalytic activity	99 out of 163 genes, 60.7%
microtubule cytoskeleton	4 out of 171 genes		osmosensory signaling pathway	2 out of 157 genes, 1.3%		endopeptidase activity	2 out of 163 genes, 1.2%
cytoskeletal part	5 out of 171 genes, 2.9%		macromolecule biosynthetic process	58 out of 157 genes, 36.9%		peptidase activity	5 out of 163 genes, 3.1%
organelle membrane	3 out of 171 genes, 1.8%		establishment or maintenance of cytoskeleton polarity	2 out of 157 genes, 1.3%		substrate-specific transporter activity	4 out of 163 genes, 2.5%
			mRNA export from nucleus	3 out of 157 genes, 1.9%		transporter activity	6 out of 163 genes, 3.7%
			response to DNA damage stimulus	13 out of 157 genes, 8.3%		acid-amino acid ligase activity	3 out of 163 genes, 1.8%
			nuclear transport	7 out of 157 genes, 4.5%		translation elongation factor activity	2 out of 163 genes, 1.2%
			ribosome biogenesis	12 out of 157 genes, 7.6%		structural molecule activity	14 out of 163 genes, 8.6%
			regulation of cellular metabolic process	22 out of 157 genes, 14.0%		unfolded protein binding	2 out of 163 genes, 1.2%
			regulation of cell cycle	7 out of 157 genes, 4.5%		isomerase activity	2 out of 163 genes, 1.2%
			endocytosis	4 out of 157 genes, 2.5%		ATP binding	10 out of 163 genes, 6.1%
			macromolecule localization	20 out of 157 genes, 12.7%		adenyl ribonucleotide binding	10 out of 163 genes, 6.1%
			RNA splicing, via transesterification reactions with bulged adenosine as nucleophile	4 out of 157 genes, 2.5%		small conjugating protein ligase activity	2 out of 163 genes, 1.2%
			nuclear mRNA splicing, via spliceosome	4 out of 157 genes, 2.5%		adenyl nucleotide binding	10 out of 163 genes, 6.1%
			RNA splicing, via transesterification reactions	4 out of 157 genes, 2.5%		binding	94 out of 163 genes, 57.7%
			cellular localization	21 out of 157 genes, 13.4%		purine nucleoside binding	10 out of 163 genes, 6.1%
			MAPKKK cascade	2 out of 157 genes, 1.3%		nucleoside binding	10 out of 163 genes, 6.1%
			pentose metabolic process	2 out of 157 genes, 1.3%		translation factor activity, nucleic acid binding	3 out of 163 genes, 1.8%
			cellular biopolymer biosynthetic process	55 out of 157 genes, 35.0%		translation regulator activity	3 out of 163 genes, 1.8%
			cellular cation homeostasis	4 out of 157 genes, 2.5%		nucleotide binding	27 out of 163 genes, 16.6%
			cellular response to oxidative stress	3 out of 157 genes, 1.9%		GTPase activity	6 out of 163 genes, 3.7%
			exocytosis	2 out of 157 genes, 1.3%		GTP binding	6 out of 163 genes, 3.7%
			cellular response to reactive oxygen species	2 out of 157 genes, 1.3%		guanyl nucleotide binding	6 out of 163 genes, 3.7%
			cation homeostasis	4 out of 157 genes, 2.5%		guanyl ribonucleotide binding	6 out of 163 genes, 3.7%
			protein import into nucleus	2 out of 157 genes, 1.3%		ribonucleotide binding	16 out of 163 genes, 9.8%
			tRNA processing	2 out of 157 genes, 1.3%		purine ribonucleotide binding	16 out of 163 genes, 9.8%
			maturation of SSU-rRNA from tricistronic rRNA transcript (SSU-rRNA, 5.8S rRNA, LSU-rRNA)	2 out of 157 genes, 1.3%		purine nucleotide binding	16 out of 163 genes, 9.8%
			nuclear import	2 out of 157 genes, 1.3%
			cellular amino acid catabolic process	2 out of 157 genes, 1.3%
			amine catabolic process	2 out of 157 genes, 1.3%
			protein localization	17 out of 157 genes, 10.8%
			regulation of DNA replication	2 out of 157 genes, 1.3%
			DNA recombination	2 out of 157 genes, 1.3%
			cell surface receptor linked signal transduction	2 out of 157 genes, 1.3%
			cellular ion homeostasis	4 out of 157 genes, 2.5%
			regulation of DNA metabolic process	2 out of 157 genes, 1.3%
			transcription	18 out of 157 genes, 11.5%
			peptidyl-amino acid modification	2 out of 157 genes, 1.3%
			regulation of metabolic process	24 out of 157 genes, 15.3%
			cellular macromolecule biosynthetic process	55 out of 157 genes, 35.0%
			nitrogen compound catabolic process	2 out of 157 genes, 1.3%
			membrane invagination	4 out of 157 genes, 2.5%
			regulation of catalytic activity	3 out of 157 genes, 1.9%
			maturation of SSU-rRNA	2 out of 157 genes, 1.3%
			tRNA metabolic process	4 out of 157 genes, 2.5%
			regulation of macromolecule biosynthetic process	20 out of 157 genes, 12.7%
			ion homeostasis	4 out of 157 genes, 2.5%
			primary metabolic process	105 out of 157 genes, 66.9%
			®ulation of macromolecule biosynthetic process	20 out of 157 genes, 12.7%
			establishment of localization in cell	17 out of 157 genes, 10.8%
			regulation of biosynthetic process	20 out of 157 genes, 12.7%
			regulation of cellular biosynthetic process	20 out of 157 genes, 12.7%
			actin filament organization	3 out of 157 genes, 1.9%
			secretion by cell	2 out of 157 genes, 1.3%
			secretion	2 out of 157 genes, 1.3%
			regulation of molecular function	3 out of 157 genes, 1.9%
			membrane organization	6 out of 157 genes, 3.8%
			nucleocytoplasmic transport	6 out of 157 genes, 3.8%
			organic acid catabolic process	2 out of 157 genes, 1.3%
			carboxylic acid catabolic process	2 out of 157 genes, 1.3%
			establishment of protein localization	14 out of 157 genes, 8.9%
			phosphorylation	9 out of 157 genes, 5.7%
			protein localization in nucleus	2 out of 157 genes, 1.3%
			tubulin complex assembly	2 out of 157 genes, 1.3%
			regulation of biological quality	10 out of 157 genes, 6.4%
			biological regulation	38 out of 157 genes, 24.2%
			pyrimidine nucleotide metabolic process	2 out of 157 genes, 1.3%
			mRNA processing	5 out of 157 genes, 3.2%
			response to osmotic stress	3 out of 157 genes, 1.9%
			DNA metabolic process	12 out of 157 genes, 7.6%
			localization	33 out of 157 genes, 21.0%
			protein kinase cascade	2 out of 157 genes, 1.3%
			nucleic acid transport	4 out of 157 genes, 2.5%
			RNA transport	4 out of 157 genes, 2.5%
			establishment of localization	30 out of 157 genes, 19.1%
			®ulation of primary metabolic process	22 out of 157 genes, 14.0%
			regulation of primary metabolic process	22 out of 157 genes, 14.0%
			vesicle-mediated transport	10 out of 157 genes, 6.4%
			proton transport	4 out of 157 genes, 2.5%
			establishment of RNA localization	4 out of 157 genes, 2.5%
			®ulation of DNA replication	2 out of 157 genes, 1.3%
			telomere maintenance	2 out of 157 genes, 1.3%
			cellular di-, tri-valent inorganic cation homeostasis	2 out of 157 genes, 1.3%
			telomere organization	2 out of 157 genes, 1.3%
			cellular protein localization	12 out of 157 genes, 7.6%
			cellular macromolecule localization	12 out of 157 genes, 7.6%
			regulation of macromolecule metabolic process	22 out of 157 genes, 14.0%
			hydrogen transport	4 out of 157 genes, 2.5%
			regulation of nucleobase, nucleoside, nucleotide and nucleic acid metabolic process	14 out of 157 genes, 8.9%
			®ulation of macromolecule metabolic process	22 out of 157 genes, 14.0%
			regulation of nitrogen compound metabolic process	14 out of 157 genes, 8.9%
			monovalent inorganic cation transport	4 out of 157 genes, 2.5%
			di-, tri-valent inorganic cation homeostasis	2 out of 157 genes, 1.3%
			RNA localization	4 out of 157 genes, 2.5%
			organelle organization	29 out of 157 genes, 18.5%
			biopolymer modification	22 out of 157 genes, 14.0%
			vacuole organization	2 out of 157 genes, 1.3%
			metabolic process	120 out of 157 genes, 76.4%
			nucleus organization	3 out of 157 genes, 1.9%
			response to reactive oxygen species	2 out of 157 genes, 1.3%
			biosynthetic process	64 out of 157 genes, 40.8%
			regulation of chromatin silencing at telomere	2 out of 157 genes, 1.3%
			homeostatic process	7 out of 157 genes, 4.5%
			meiosis	3 out of 157 genes, 1.9%
			M phase of meiotic cell cycle	3 out of 157 genes, 1.9%
			nucleobase, nucleoside, nucleotide and nucleic acid transport	4 out of 157 genes, 2.5%
			protein transport	13 out of 157 genes, 8.3%
			phosphate metabolic process	9 out of 157 genes, 5.7%
			cellular response to stress	17 out of 157 genes, 10.8%
			transport	29 out of 157 genes, 18.5%
			meiotic cell cycle	3 out of 157 genes, 1.9%
			cytoskeleton organization	7 out of 157 genes, 4.5%
			regulation of chromatin assembly or disassembly	2 out of 157 genes, 1.3%
			®ulation of chromatin assembly	2 out of 157 genes, 1.3%
			regulation of chromatin assembly	2 out of 157 genes, 1.3%
			®ulation of heterochromatin formation	2 out of 157 genes, 1.3%
			regulation of heterochromatin formation	2 out of 157 genes, 1.3%
			heterochromatin formation	2 out of 157 genes, 1.3%
			regulation of chromatin silencing	2 out of 157 genes, 1.3%
			heterochromatin organization	2 out of 157 genes, 1.3%
			phosphorus metabolic process	9 out of 157 genes, 5.7%
			anatomical structure homeostasis	2 out of 157 genes, 1.3%
			chromatin silencing at centromere	6 out of 157 genes, 3.8%
			exonucleolytic trimming during rRNA processing	2 out of 157 genes, 1.3%
			exonucleolytic trimming to generate mature 3'-end of 5.8S rRNA from tricistronic rRNA transcript	2 out of 157 genes, 1.3%
			rRNA 3'-end processing	2 out of 157 genes, 1.3%
			protein targeting	4 out of 157 genes, 2.5%
			transcription from RNA polymerase II promoter	5 out of 157 genes, 3.2%
			chromosome organization	17 out of 157 genes, 10.8%
			regulation of gene expression	18 out of 157 genes, 11.5%
			response to oxidative stress	4 out of 157 genes, 2.5%
			ncRNA 3'-end processing	2 out of 157 genes, 1.3%
			response to drug	2 out of 157 genes, 1.3%
			cellular amino acid metabolic process	9 out of 157 genes, 5.7%
			cellular amine metabolic process	9 out of 157 genes, 5.7%
			mRNA metabolic process	5 out of 157 genes, 3.2%
			cation transport	4 out of 157 genes, 2.5%
			protein amino acid phosphorylation	5 out of 157 genes, 3.2%
			intracellular protein transport	9 out of 157 genes, 5.7%
			DNA repair	8 out of 157 genes, 5.1%
			cellular response to stimulus	17 out of 157 genes, 10.8%
			transcription, DNA-dependent	14 out of 157 genes, 8.9%
			RNA biosynthetic process	14 out of 157 genes, 8.9%
			RNA export from nucleus	3 out of 157 genes, 1.9%
			regulation of biological process	33 out of 157 genes, 21.0%
			chromatin assembly or disassembly	12 out of 157 genes, 7.6%
			maturation of 5.8S rRNA	2 out of 157 genes, 1.3%
			maturation of 5.8S rRNA from tricistronic rRNA transcript	2 out of 157 genes, 1.3%
			cell cycle	11 out of 157 genes, 7.0%
			cellular homeostasis	5 out of 157 genes, 3.2%
			cellular biosynthetic process	60 out of 157 genes, 38.2%
			chromatin organization	15 out of 157 genes, 9.6%
			regulation of transcription	12 out of 157 genes, 7.6%
			carboxylic acid metabolic process	12 out of 157 genes, 7.6%
			oxoacid metabolic process	12 out of 157 genes, 7.6%
			regulation of cellular process	31 out of 157 genes, 19.7%
			cellular ketone metabolic process	12 out of 157 genes, 7.6%
			response to stress	23 out of 157 genes, 14.6%
			intracellular transport	14 out of 157 genes, 8.9%
			pyruvate metabolic process	2 out of 157 genes, 1.3%
			organic acid metabolic process	12 out of 157 genes, 7.6%
			regulation of chromosome organization	2 out of 157 genes, 1.3%
			regulation of translation	6 out of 157 genes, 3.8%
			tRNA aminoacylation for protein translation	2 out of 157 genes, 1.3%
			negative regulation of nucleobase, nucleoside, nucleotide and nucleic acid metabolic process	10 out of 157 genes, 6.4%
			response to stimulus	26 out of 157 genes, 16.6%
			regulation of cellular protein metabolic process	6 out of 157 genes, 3.8%
			nuclear export	3 out of 157 genes, 1.9%
			membrane fusion	2 out of 157 genes, 1.3%
			nucleoside phosphate metabolic process	5 out of 157 genes, 3.2%
			nucleotide metabolic process	nucleotide metabolic process
			amino acid activation	2 out of 157 genes, 1.3%
			tRNA aminoacylation	2 out of 157 genes, 1.3%
			negative regulation of macromolecule biosynthetic process	10 out of 157 genes, 6.4%
			protein modification process	19 out of 157 genes, 12.1%
			negative regulation of biosynthetic process	10 out of 157 genes, 6.4%
			negative regulation of macromolecule biosynthetic process	10 out of 157 genes, 6.4%
			negative regulation of cellular biosynthetic process	10 out of 157 genes, 6.4%
			post-translational protein modification	12 out of 157 genes, 7.6%
			negative regulation of cellular metabolic process	10 out of 157 genes, 6.4%
			negative regulation of cellular process	11 out of 157 genes, 7.0%
			serine family amino acid metabolic process	2 out of 157 genes, 1.3%
			regulation of cell cycle process	2 out of 157 genes, 1.3%
			®ulation of cell cycle process	2 out of 157 genes, 1.3%
			response to abiotic stimulus	4 out of 157 genes, 2.5%
			chromatin silencing at telomere	2 out of 157 genes, 1.3%
			regulation of transcription, DNA-dependent	11 out of 157 genes, 7.0%
			protein-DNA complex assembly	10 out of 157 genes, 6.4%
			regulation of RNA metabolic process	11 out of 157 genes, 7.0%
			cellular amino acid and derivative metabolic process	9 out of 157 genes, 5.7%
			chromatin silencing	8 out of 157 genes, 5.1%
			negative regulation of gene expression, epigenetic	8 out of 157 genes, 5.1%
			gene silencing	8 out of 157 genes, 5.1%
			regulation of gene expression, epigenetic	8 out of 157 genes, 5.1%
			ion transport	4 out of 157 genes, 2.5%
			actin cytoskeleton organization	3 out of 157 genes, 1.9%
			amine metabolic process	9 out of 157 genes, 5.7%
			cellular response to DNA damage stimulus	8 out of 157 genes, 5.1%
			actin filament-based process	3 out of 157 genes, 1.9%
			modification-dependent protein catabolic process	8 out of 157 genes, 5.1%
			methylation	2 out of 157 genes, 1.3%
			biopolymer methylation	2 out of 157 genes, 1.3%
			modification-dependent macromolecule catabolic process	8 out of 157 genes, 5.1%
			response to chemical stimulus	7 out of 157 genes, 4.5%
			cell cycle phase	5 out of 157 genes, 3.2%
			protein import	2 out of 157 genes, 1.3%
			proteolysis involved in cellular protein catabolic process	8 out of 157 genes, 5.1%
			RNA 3'-end processing	2 out of 157 genes, 1.3%
			translation	32 out of 157 genes, 20.4%
			posttranscriptional regulation of gene expression	6 out of 157 genes, 3.8%
			chromatin assembly	10 out of 157 genes, 6.4%
			establishment or maintenance of cell polarity	2 out of 157 genes, 1.3%
			cellular response to heat	2 out of 157 genes, 1.3%
			proteolysis	9 out of 157 genes, 5.7%
			chromatin modification	5 out of 157 genes, 3.2%
			nucleotide biosynthetic process	3 out of 157 genes, 1.9%
			®ulation of cellular component biogenesis	2 out of 157 genes, 1.3%
			regulation of cellular component biogenesis	2 out of 157 genes, 1.3%
			DNA packaging	10 out of 157 genes, 6.4%
			regulation of mitotic cell cycle	3 out of 157 genes, 1.9%
			regulation of cellular component organization	3 out of 157 genes, 1.9%
			negative regulation of biological process	11 out of 157 genes, 7.0%
			M phase	4 out of 157 genes, 2.5%
			-negative regulation of macromolecule metabolic process	10 out of 157 genes, 6.4%
			negative regulation of macromolecule metabolic process	10 out of 157 genes, 6.4%
			regulation of protein metabolic process	8 out of 157 genes, 5.1%
			protein localization in organelle	2 out of 157 genes, 1.3%
			negative regulation of metabolic process	10 out of 157 genes, 6.4%
			protein modification by small protein conjugation	5 out of 157 genes, 3.2%
			response to heat	2 out of 157 genes, 1.3%
			cellular protein metabolic process	57 out of 157 genes, 36.3%
			protein modification by small protein conjugation or removal	5 out of 157 genes, 3.2%
			cellular catabolic process	12 out of 157 genes, 7.6%
			cellular biopolymer catabolic process	9 out of 157 genes, 5.7%
			cellular protein catabolic process	8 out of 157 genes, 5.1%
			negative regulation of transcription, DNA-dependent	8 out of 157 genes, 5.1%
			negative regulation of RNA metabolic process	8 out of 157 genes, 5.1%
			negative regulation of transcription	8 out of 157 genes, 5.1%
			cellular macromolecule catabolic process	9 out of 157 genes, 5.7%
			-negative regulation of gene expression	8 out of 157 genes, 5.1%
			negative regulation of gene expression	8 out of 157 genes, 5.1%
			purine nucleoside biosynthetic process	2 out of 157 genes, 1.3%
			purine ribonucleoside biosynthetic process	2 out of 157 genes, 1.3%
			monocarboxylic acid metabolic process	2 out of 157 genes, 1.3%
			positive regulation of cellular process	2 out of 157 genes, 1.3%
			cell cycle process	6 out of 157 genes, 3.8%
			positive regulation of biological process	2 out of 157 genes, 1.3%
			nucleoside biosynthetic process	2 out of 157 genes, 1.3%
			ribonucleoside biosynthetic process	2 out of 157 genes, 1.3%
			protein metabolic process	58 out of 157 genes, 36.9%
			nucleoside metabolic process	3 out of 157 genes, 1.9%
			chromatin remodeling	3 out of 157 genes, 1.9%
			nucleosome assembly	8 out of 157 genes, 5.1%
			cell morphogenesis	2 out of 157 genes, 1.3%
			cofactor metabolic process	3 out of 157 genes, 1.9%
			cellular carbohydrate metabolic process	9 out of 157 genes, 5.7%
			response to temperature stimulus	2 out of 157 genes, 1.3%
			cellular component biogenesis	27 out of 157 genes, 17.2%
			cellular component organization	34 out of 157 genes, 21.7%
			cellular component morphogenesis	2 out of 157 genes, 1.3%
			anatomical structure morphogenesis	2 out of 157 genes, 1.3%
			protein ubiquitination	4 out of 157 genes, 2.5%
			nucleobase, nucleoside and nucleotide metabolic process	5 out of 157 genes, 3.2%
			chromosome segregation	2 out of 157 genes, 1.3%
			nucleoside triphosphate metabolic process	2 out of 157 genes, 1.3%
			purine nucleotide biosynthetic process	2 out of 157 genes, 1.3%
			heterocycle metabolic process	4 out of 157 genes, 2.5%
			biopolymer catabolic process	10 out of 157 genes, 6.4%
			macromolecule catabolic process	10 out of 157 genes, 6.4%
			protein catabolic process	9 out of 157 genes, 5.7%
			purine nucleotide metabolic process	2 out of 157 genes, 1.3%
			cellular nitrogen compound metabolic process	6 out of 157 genes, 3.8%
			regulation of organelle organization	2 out of 157 genes, 1.3%
			nucleosome organization	8 out of 157 genes, 5.1%
			ascospore formation	2 out of 157 genes, 1.3%
			sexual sporulation	2 out of 157 genes, 1.3%
			sexual sporulation resulting in formation of a cellular spore	2 out of 157 genes, 1.3%
			cell development	2 out of 157 genes, 1.3%
			nucleobase, nucleoside and nucleotide biosynthetic process	2 out of 157 genes, 1.3%
			nucleobase, nucleoside, nucleotide and nucleic acid biosynthetic process	2 out of 157 genes, 1.3%
			carbohydrate metabolic process	14 out of 157 genes, 8.9%
			one-carbon metabolic process	2 out of 157 genes, 1.3%
			reproductive process in single-celled organism	2 out of 157 genes, 1.3%
			cellular lipid metabolic process	2 out of 157 genes, 1.3%
			cellular lipid metabolic process	2 out of 157 genes, 1.3%
			reproductive process	2 out of 157 genes, 1.3%
			purine ribonucleoside metabolic process	2 out of 157 genes, 1.3%
			reproduction of a single-celled organism	2 out of 157 genes, 1.3%
			Golgi vesicle transport	2 out of 157 genes, 1.3%
			purine nucleoside metabolic process	2 out of 157 genes, 1.3% 8
			ribonucleoside metabolic process	2 out of 157 genes, 1.3%
			ubiquitin-dependent protein catabolic process	4 out of 157 genes, 2.5%
			cellular component assembly	18 out of 157 genes, 11.5%
			anatomical structure formation	18 out of 157 genes, 11.5%
			cytokinesis	2 out of 157 genes, 1.3%
			macromolecular complex assembly	14 out of 157 genes, 8.9%
			anatomical structure development	4 out of 157 genes, 2.5%
			transmembrane transport	2 out of 157 genes, 1.3%
			lipid metabolic process	2 out of 157 genes, 1.3%
			protein folding	3 out of 157 genes, 1.9%
			cellular amino acid biosynthetic process	2 out of 157 genes, 1.3%
			cellular developmental process	4 out of 157 genes, 2.5%
			nitrogen compound biosynthetic process	4 out of 157 genes, 2.5%
			catabolic process	13 out of 157 genes
			alcohol metabolic process	5 out of 157 genes, 3.2%
			cellular macromolecular complex assembly	13 out of 157 genes, 8.3%
			multicellular organismal development	2 out of 157 genes, 1.3%
			mycelium development	2 out of 157 genes, 1.3%
			multicellular organismal process	2 out of 157 genes, 1.3%
			multicellular organismal process	2 out of 157 genes, 1.3%
			translational initiation	2 out of 157 genes, 1.3%
			mitotic cell cycle	3 out of 157 genes, 1.9%
			monosaccharide metabolic process	4 out of 157 genes, 2.5%
			organic acid biosynthetic process	2 out of 157 genes, 1.3%
			carboxylic acid biosynthetic process	2 out of 157 genes, 1.3%
			amine biosynthetic process	2 out of 157 genes, 1.3%
			sexual reproduction	2 out of 157 genes, 1.3%
			translational elongation	2 out of 157 genes, 1.3%
			macromolecular complex subunit organization	15 out of 157 genes, 9.6%
			sporulation resulting in formation of a cellular spore	2 out of 157 genes, 1.3%
			sporulation	2 out of 157 genes, 1.3%
			cell division	2 out of 157 genes, 1.3%
			cell differentiation	2 out of 157 genes, 1.3%
			reproduction	7 out of 157 genes, 4.5%
			cell communication	7 out of 157 genes, 4.5%
			signal transduction	6 out of 157 genes, 3.8%
			cellular macromolecular complex subunit organization	14 out of 157 genes, 8.9%
			intracellular signaling cascade	4 out of 157 genes, 2.5%
			developmental process	6 out of 157 genes, 3.8%
			generation of precursor metabolites and energy	3 out of 157 genes, 1.9%
			small GTPase mediated signal transduction	2 out of 157 genes, 1.3%
			hexose metabolic process	2 out of 157 genes, 1.3%
			protein complex assembly	3 out of 157 genes, 1.9%
			protein complex biogenesis	3 out of 157 genes, 1.9%
			cellular protein complex assembly	2 out of 157 genes, 1.3%
