# Supplementary material for: Transcriptome Profile Analysis of Sugarcane Responses to Sporisorium scitaminea Infection Using Solexa Sequencing Technology
Source: Biomed Res Int. 2013 Oct 23;2013:298920. doi: 10.1155/2013/298920 (PMC3830884; doi:10.1155/2013/298920)
Supplement: Supplementary file 5 [file 298920.f5.xls]

## Sheet: Sheet1
	Additional File 5 -Pathway annotation of 305 differently expressed genes in sugarcane
No	Pathway	Numeber (percent)	Used in figure 3 (up-regulated/down-regulated)	Qvalue	Pathway ID
1	Homologous recombination	4 (1.32%)		0.30377	ko03440
2	SNARE interactions in vesicular transport	5 (1.65%)		0.52804	ko04130
3	Phosphatidylinositol signaling system	7 (2.31%)	Yes(1.56%/1.54%)	0.52804	ko04070
4	Steroid biosynthesis	5 (1.65%)		0.673524	ko00100
5	ABC transporters	3 (0.99%)		0.673524	ko02010
6	Ubiquinone and other terpenoid-quinone biosynthesis	2 (0.66%)		0.673524	ko00130
7	Ribosome	35 (11.55%)	Yes(8.2%/3.35%)	0.673524	ko03010
8	Oxidative phosphorylation	12 (3.96%)	Yes(2.8%/1.16%)	0.673524	ko00190
9	Glycosaminoglycan degradation	1 (0.33%)		0.673524	ko00531
10	Inositol phosphate metabolism	5 (1.65%)		0.673524	ko00562
11	Basal transcription factors	3 (0.99%)		0.673524	ko03022
12	Glycine, serine and threonine metabolism	5 (1.65%)		0.673524	ko00260
13	Phenylalanine metabolism	4 (1.32%)		0.673524	ko00360
14	Amino sugar and nucleotide sugar metabolism	8 (2.64%)	Yes(1.58%/1.06%)	0.673524	ko00520
15	Pyrimidine metabolism	7 (2.31%)	Yes(1.93%/0.38%)	0.673524	ko00240
16	Non-homologous end-joining	1 (0.33%)		0.673524	ko03450
17	Ubiquitin mediated proteolysis	12 (3.96%)	Yes(1.8%/2.16%)	0.673524	ko04120
18	Biosynthesis of unsaturated fatty acids	3 (0.99%)		0.673524	ko01040
19	Fatty acid biosynthesis	2 (0.66%)		0.673524	ko00061
20	Pentose phosphate pathway	6 (1.98%)	Yes(1.24%/0.74%)	0.673524	ko00030
21	Mismatch repair	2 (0.66%)		0.697091	ko03430
22	RNA polymerase	3 (0.99%)		0.708452	ko03020
23	Nicotinate and nicotinamide metabolism	1 (0.33%)		0.857415	ko00760
24	Glycosphingolipid biosynthesis - globo series	1 (0.33%)		0.857415	ko00603
25	Taurine and hypotaurine metabolism	1 (0.33%)		0.922988	ko00430
26	Cyanoamino acid metabolism	4 (1.32%)		0.922988	ko00460
27	Other glycan degradation	1 (0.33%)		0.922988	ko00511
28	Lysine biosynthesis	1 (0.33%)		0.923639	ko00300
29	Glycerophospholipid metabolism	2 (0.66%)		0.982064	ko00564
30	Arachidonic acid metabolism	1 (0.33%)		0.982064	ko00590
31	Nucleotide excision repair	3 (0.99%)		0.982064	ko03420
32	Tyrosine metabolism	6 (1.98%)		0.982064	ko00350
33	DNA replication	2 (0.66%)		0.982064	ko03030
34	Glycosylphosphatidylinositol(GPI)-anchor biosynthesis	1 (0.33%)		0.982064	ko00563
35	One carbon pool by folate	2 (0.66%)		0.982064	ko00670
36	Aminoacyl-tRNA biosynthesis	3 (0.99%)		0.982064	ko00970
37	Valine, leucine and isoleucine biosynthesis	2 (0.66%)		0.982064	ko00290
38	Synthesis and degradation of ketone bodies	1 (0.33%)		0.982064	ko00072
39	Histidine metabolism	2 (0.66%)		0.982064	ko00340
40	Nitrogen metabolism	3 (0.99%)		0.982064	ko00910
41	Methane metabolism	3 (0.99%)		0.982064	ko00680
42	Purine metabolism	8 (2.64%)	Yes(1.89%/0.75%)	0.982064	ko00230
43	Pentose and glucuronate interconversions	3 (0.99%)		0.982064	ko00040
44	Regulation of autophagy	1 (0.33%)		0.982064	ko04140
45	Base excision repair	1 (0.33%)		0.982064	ko03410
46	Pantothenate and CoA biosynthesis	1 (0.33%)		0.982064	ko00770
47	alpha-Linolenic acid metabolism	1 (0.33%)		0.982064	ko00592
48	Metabolic pathways	71 (23.43%)	Yes(15.51%/7.92%)	0.982064	ko01100
49	Glycerolipid metabolism	3 (0.99%)		0.982064	ko00561
50	Cell cycle - yeast	9 (2.97%)	Yes(2.55%/0.42%)	0.982064	ko04111
51	Spliceosome	10 (3.3%)	Yes(1.98%/1.32%)	0.982064	ko03040
52	Meiosis - yeast	9 (2.97%)	Yes(2.64%/0.33%)	0.982064	ko04113
53	Pyruvate metabolism	7 (2.31%)		0.982064	ko00620
54	Alanine, aspartate and glutamate metabolism	4 (1.32%)		0.982064	ko00250
55	Galactose metabolism	3 (0.99%)		0.982064	ko00052
56	Proteasome	5 (1.65%)		0.982064	ko03050
57	beta-Alanine metabolism	2 (0.66%)		0.982064	ko00410
58	Arginine and proline metabolism	4 (1.32%)		0.982064	ko00330
59	Butanoate metabolism	4 (1.32%)		0.988538	ko00650
60	Fructose and mannose metabolism	4 (1.32%)		0.988538	ko00051
61	Linoleic acid metabolism	1 (0.33%)		0.995233	ko00591
62	Limonene and pinene degradation	4 (1.32%)		0.995233	ko00903
63	Protein export	1 (0.33%)		0.995233	ko03060
64	MAPK signaling pathway - yeast	5 (1.65%)	Yes(1.32%/0.33%)	0.995233	ko04011
65	Peroxisome	3 (0.99%)		0.995233	ko04146
66	Valine, leucine and isoleucine degradation	2 (0.66%)		0.995233	ko00280
67	Citrate cycle (TCA cycle)	3 (0.99%)		0.995233	ko00020
68	RNA degradation	3 (0.99%)		0.995233	ko03018
69	Glyoxylate and dicarboxylate metabolism	1 (0.33%)		0.995233	ko00630
70	RNA degradation	3 (0.99%)		0.995233	ko03018
71	Endocytosis	4 (1.32%)		0.995233	ko04144
72	Starch and sucrose metabolism	3 (0.99%)		0.995233	ko00500
73	Selenoamino acid metabolism	2 (0.66%)		0.995233	ko00450
74	Glycolysis / Gluconeogenesis	11 (3.63%)	Yes(3.27%/0.36%)	0.995233	ko00010
75	Fatty acid metabolism	3 (0.99%)		0.995233	ko00071
76	Metabolism of xenobiotics by cytochrome P450	2 (0.66%)		0.995233	ko00980
77	Propanoate metabolism	1 (0.33%)		0.995233	ko00640
78	Cysteine and methionine metabolism	2 (0.66%)		0.995233	ko00270
79	Glutathione metabolism	1 (0.33%)		0.995233	ko00480
